# Supplementary material for: A Statistical Analysis on the Effect of Antioxidants on the Thermal-Oxidative Stability of Commercial Mass- and Emulsion-Polymerized ABS
Source: MDPI journal article supplement (doi:10.3390/polym11010025), 2018-12-25
Supplement: s1 [file s1]

ANOVA Results: R1

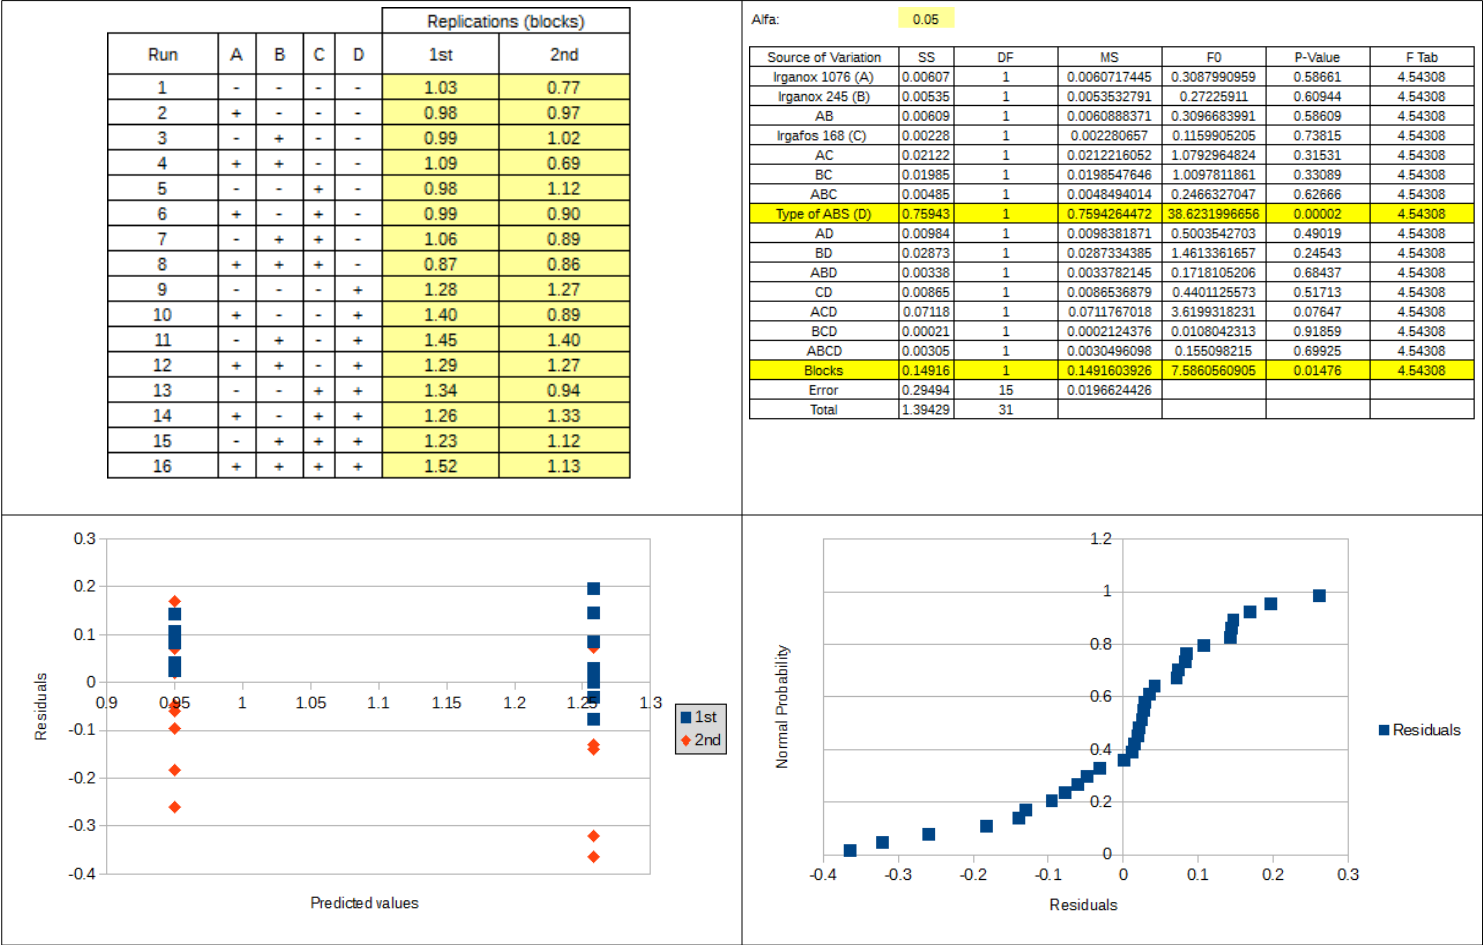

ANOVA Results: R2

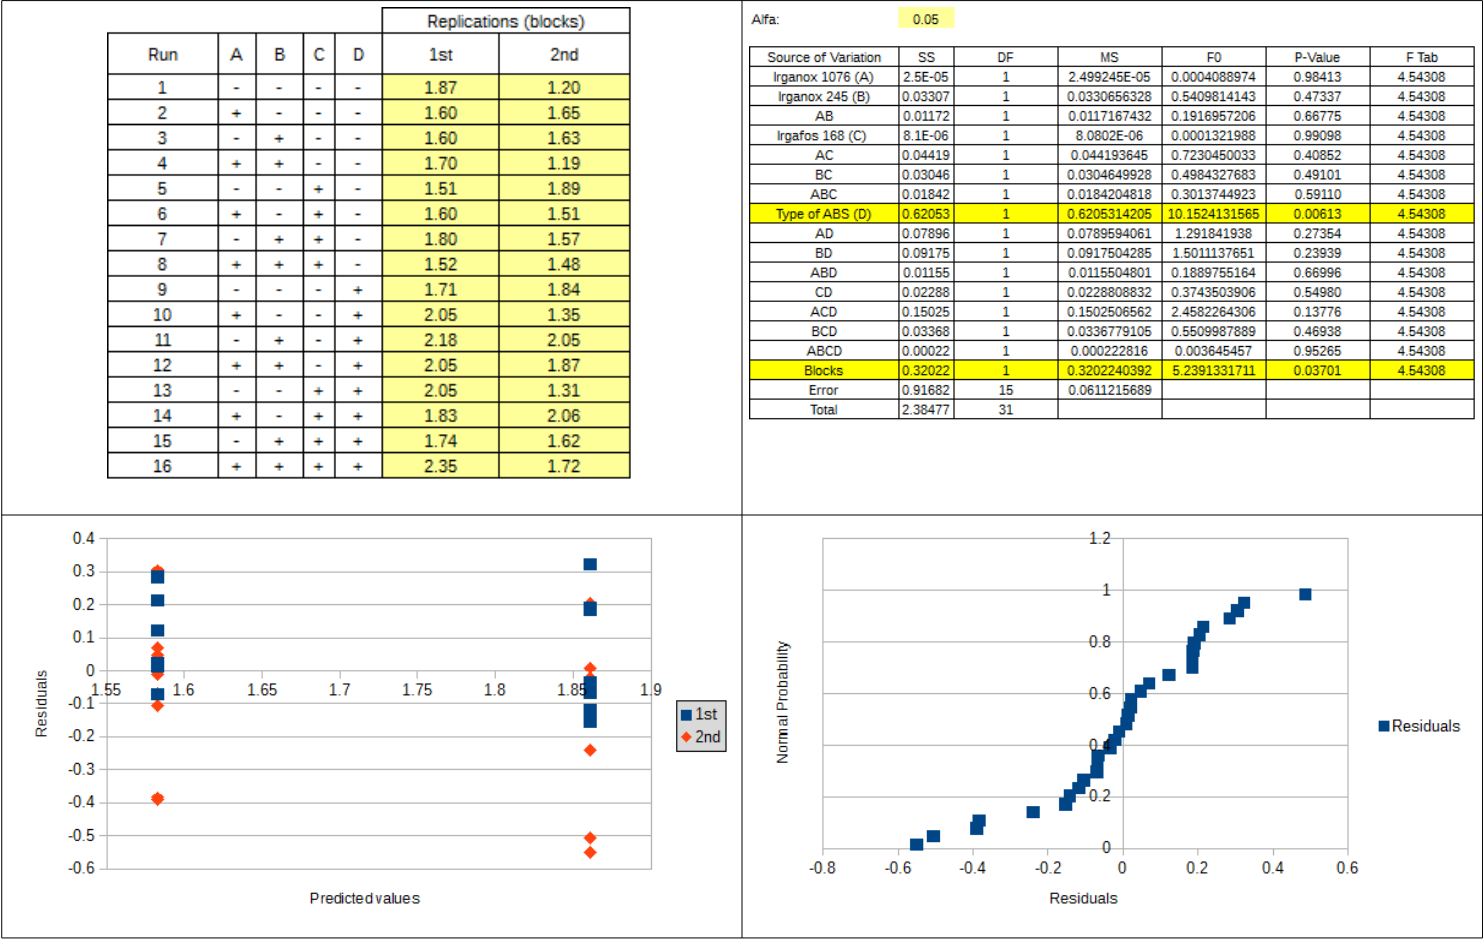

This scatter plot shows the residuals for each of the 16 runs, categorized by two replicates (1st and 2nd). The x-axis represents the predicted values, ranging from 1.55 to 1.9. The y-axis represents the residuals, ranging from -0.6 to 0.4. The 1st replicate is shown as blue squares and the 2nd as red diamonds. Most data points are clustered between predicted values of 1.55 and 1.65, with a few outliers at higher predicted values around 1.85-1.9. The residuals for the 1st and 2nd replicates are generally close to each other for the same run.

This normal probability plot shows the distribution of the residuals. The x-axis is labeled 'Residuals' and ranges from -0.8 to 0.6. The y-axis is labeled 'Normal Probability' and ranges from 0 to 1.2. The data points, represented by blue squares, follow a roughly linear trend, indicating that the residuals are approximately normally distributed. There are some deviations from linearity at the extreme ends of the distribution.

ANOVA Results: R3

| Run | A | B | C | D | Replications (blocks) |      |
|-----|---|---|---|---|-----------------------|------|
|     |   |   |   |   | 1st                   | 2nd  |
| 1   | - | - | - | - | 1.14                  | 1.41 |
| 2   | + | - | - | - | 1.26                  | 1.35 |
| 3   | - | + | - | - | 1.39                  | 1.42 |
| 4   | + | + | - | - | 1.31                  | 1.21 |
| 5   | - | - | + | - | 1.36                  | 1.45 |
| 6   | + | - | + | - | 1.25                  | 1.37 |
| 7   | - | + | + | - | 1.29                  | 1.32 |
| 8   | + | + | + | - | 1.31                  | 1.37 |
| 9   | - | - | - | + | 1.83                  | 1.98 |
| 10  | + | - | - | + | 1.79                  | 2.03 |
| 11  | - | + | - | + | 1.96                  | 2.10 |
| 12  | + | + | - | + | 1.80                  | 2.11 |
| 13  | - | - | + | + | 1.52                  | 1.68 |
| 14  | + | - | + | + | 1.68                  | 2.18 |
| 15  | - | + | + | + | 1.77                  | 2.08 |
| 16  | + | + | + | + | 2.09                  | 2.10 |

| Alfa:               |         | 0.05 |              |                |         |         |
|---------------------|---------|------|--------------|----------------|---------|---------|
| Source of Variation | SS      | DF   | MS           | F0             | P-Value | F Tab   |
| Irganox 1076 (A)    | 0.0072  | 1    | 0.0072006    | 0.6635536142   | 0.42805 | 4.54308 |
| Irganox 245 (B)     | 0.0548  | 1    | 0.0547970513 | 5.0496877121   | 0.04011 | 4.54308 |
| AB                  | 0.01026 | 1    | 0.0102638628 | 0.9458410761   | 0.34620 | 4.54308 |
| Irgafos 168 (C)     | 0.00228 | 1    | 0.0022767752 | 0.2098106283   | 0.65348 | 4.54308 |
| AC                  | 0.04992 | 1    | 0.0499201003 | 4.6002642731   | 0.04875 | 4.54308 |
| BC                  | 0.00322 | 1    | 0.003224045  | 0.2971039508   | 0.59372 | 4.54308 |
| ABC                 | 0.00647 | 1    | 0.006474651  | 0.5966555665   | 0.45186 | 4.54308 |
| Type of ABS (D)     | 2.80704 | 1    | 2.807040027  | 258.6758814296 | 0.00000 | 4.54308 |
| AD                  | 0.04672 | 1    | 0.0467170745 | 4.3050972893   | 0.05562 | 4.54308 |
| BD                  | 0.06277 | 1    | 0.0627686341 | 4.8627639113   | 0.04346 | 4.54308 |
| ABD                 | 0.0047  | 1    | 0.0046977125 | 0.4329061563   | 0.52054 | 4.54308 |
| CD                  | 0.01635 | 1    | 0.016345224  | 1.5062539857   | 0.23863 | 4.54308 |
| ACD                 | 0.03477 | 1    | 0.034768845  | 3.2040375414   | 0.09366 | 4.54308 |
| BCD                 | 0.02818 | 1    | 0.0281829411 | 2.5971297393   | 0.12789 | 4.54308 |
| ABCD                | 0.02009 | 1    | 0.0200880968 | 1.8511692373   | 0.19374 | 4.54308 |
| Blocks              | 0.17816 | 1    | 0.1781627125 | 16.4181473144  | 0.00104 | 4.54308 |
| Error               | 0.16277 | 15   | 0.0108515723 |                |         |         |
| Total               | 3.4857  | 31   |              |                |         |         |

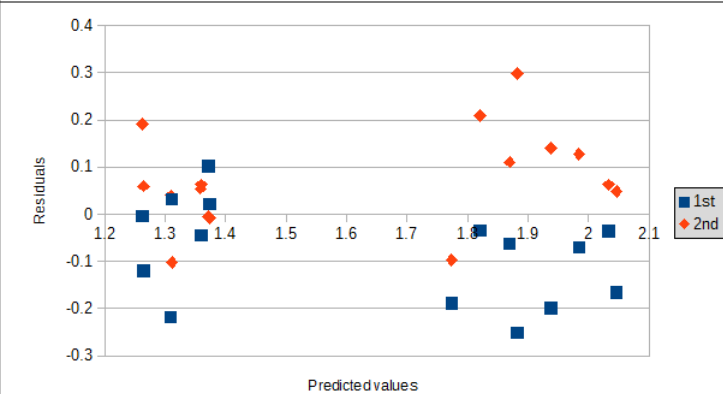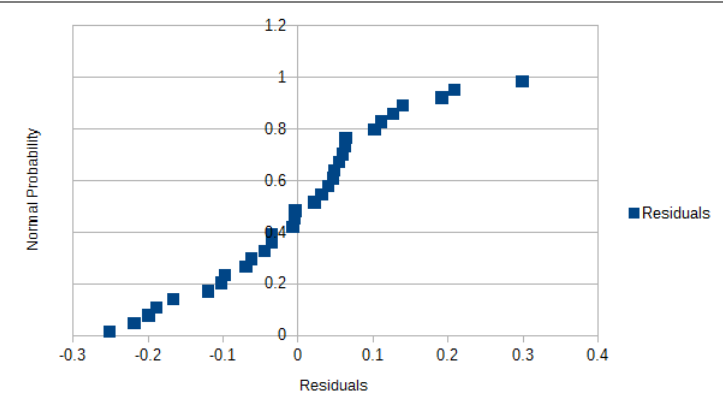

ANOVA Results: R4

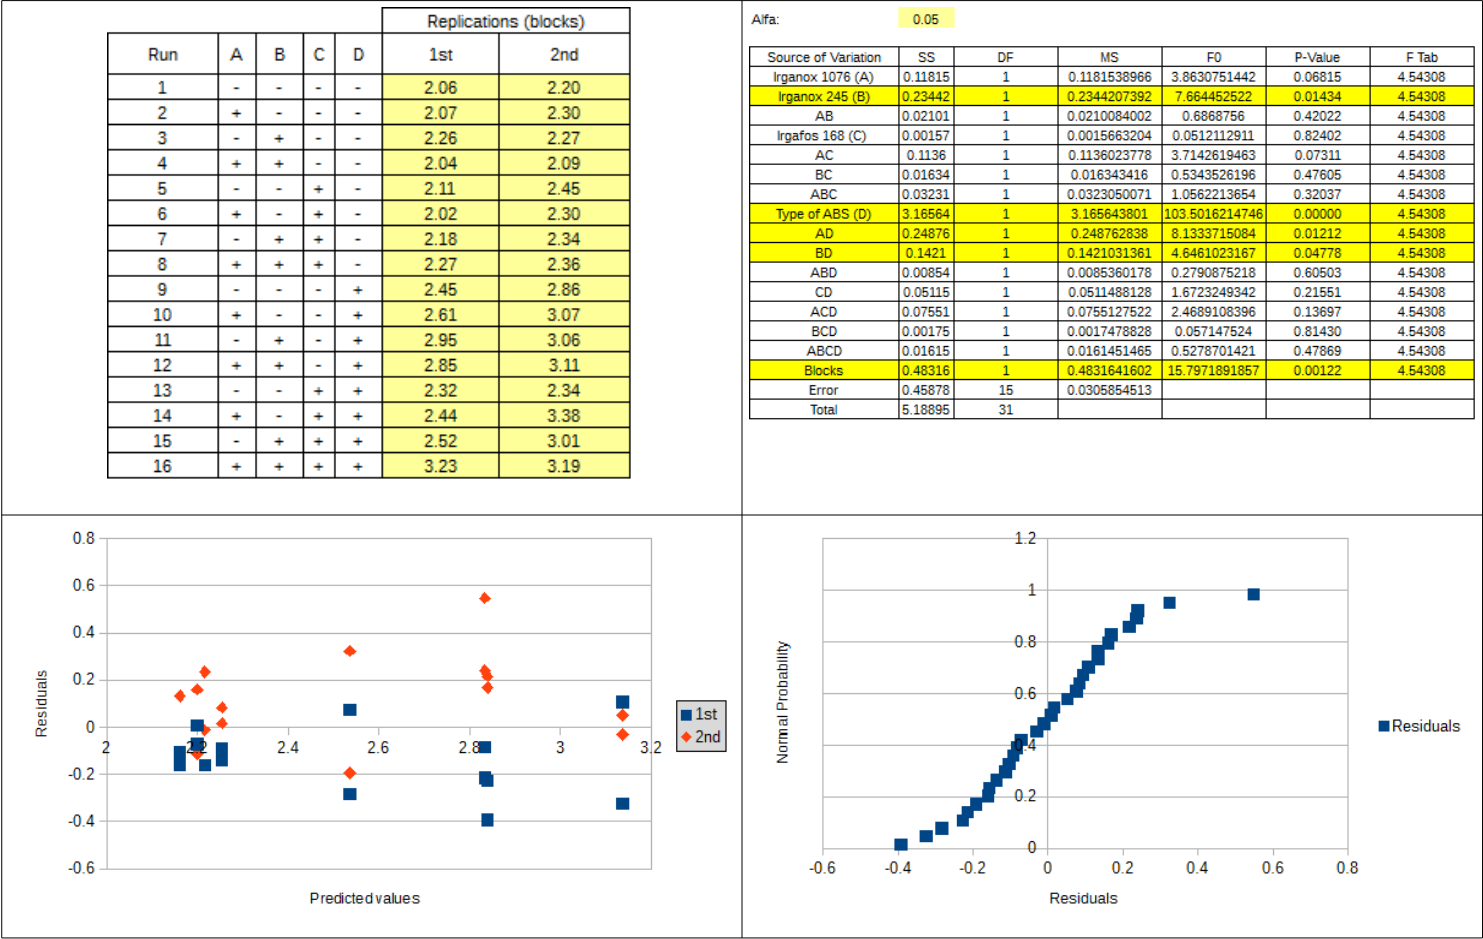

This scatter plot shows the residuals for each of the 16 runs, categorized by the two replicates (1st and 2nd). The x-axis represents the predicted values, ranging from approximately 2.0 to 3.2. The y-axis represents the residuals, ranging from -0.6 to 0.8. The 1st replicate is shown in blue squares and the 2nd replicate in red diamonds. The data points are scattered around the zero line, with some outliers visible, particularly for the 2nd replicate at higher predicted values.

This plot shows the residuals against a normal distribution. The x-axis is labeled 'Residuals' and ranges from -0.6 to 0.8. The y-axis is labeled 'Normal Probability' and ranges from 0 to 1.2. The data points, represented by blue squares, follow a straight line, indicating that the residuals are approximately normally distributed. There are a few points that deviate slightly from the line at the extremes.

ANOVA Results: OOT

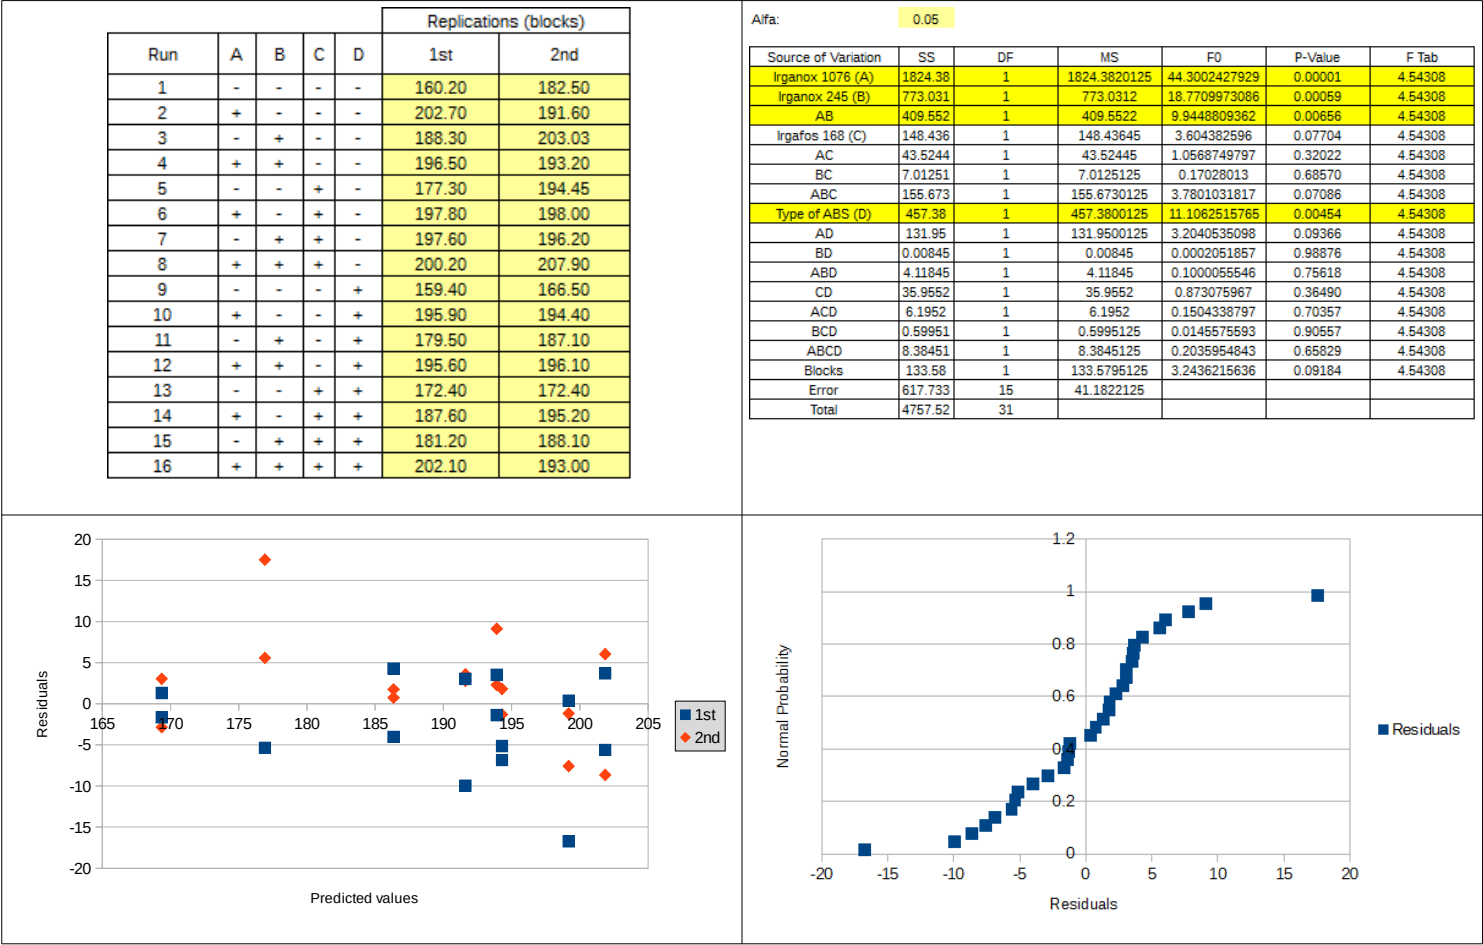

ANOVA Results: OP

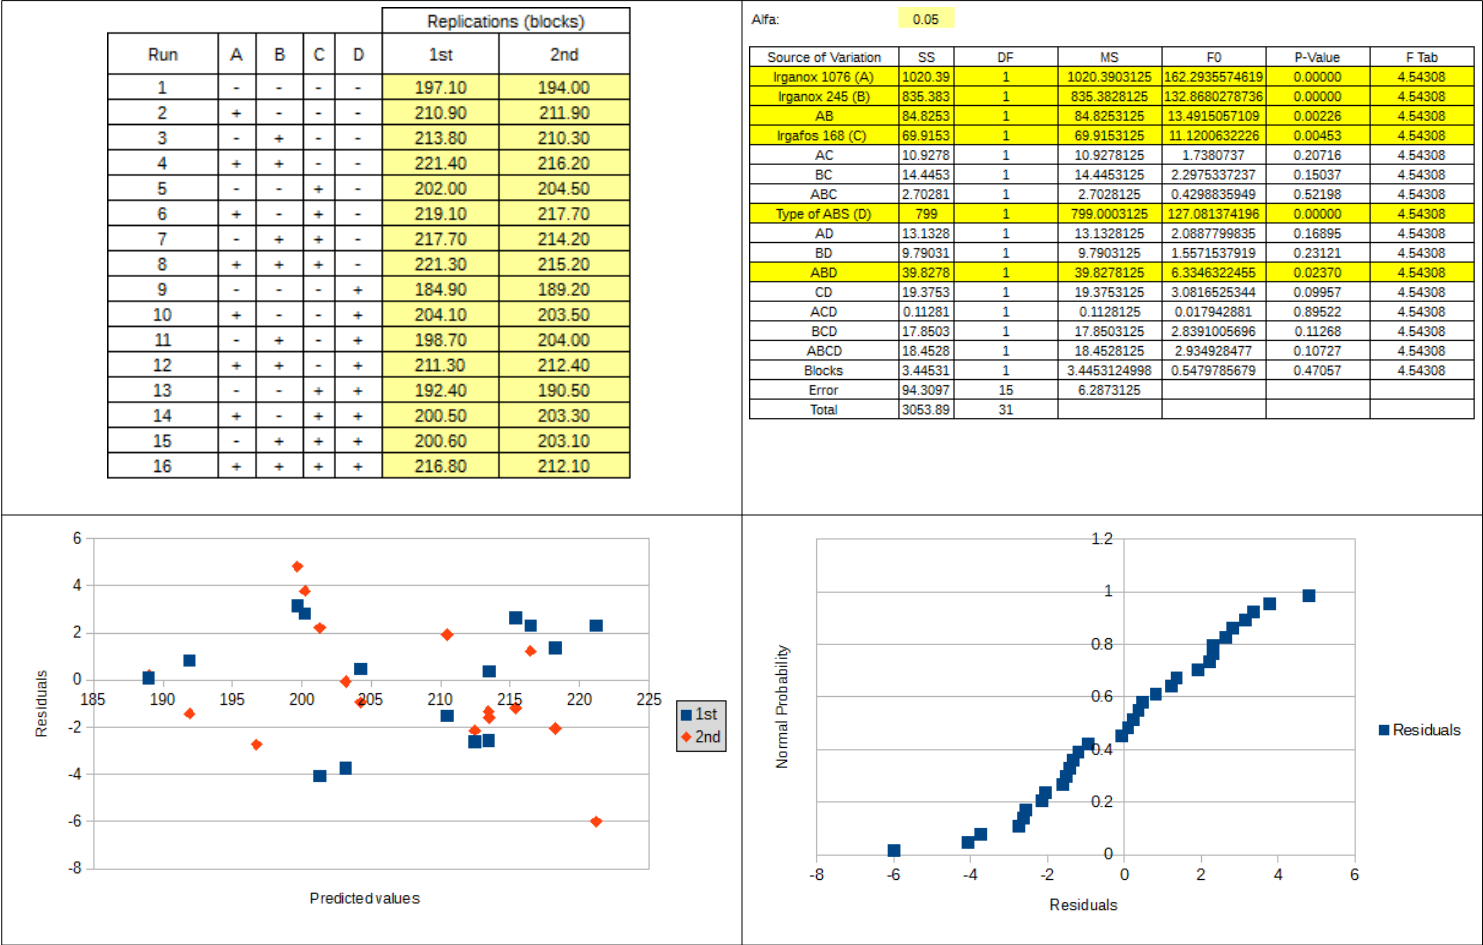

ANOVA Results: YI

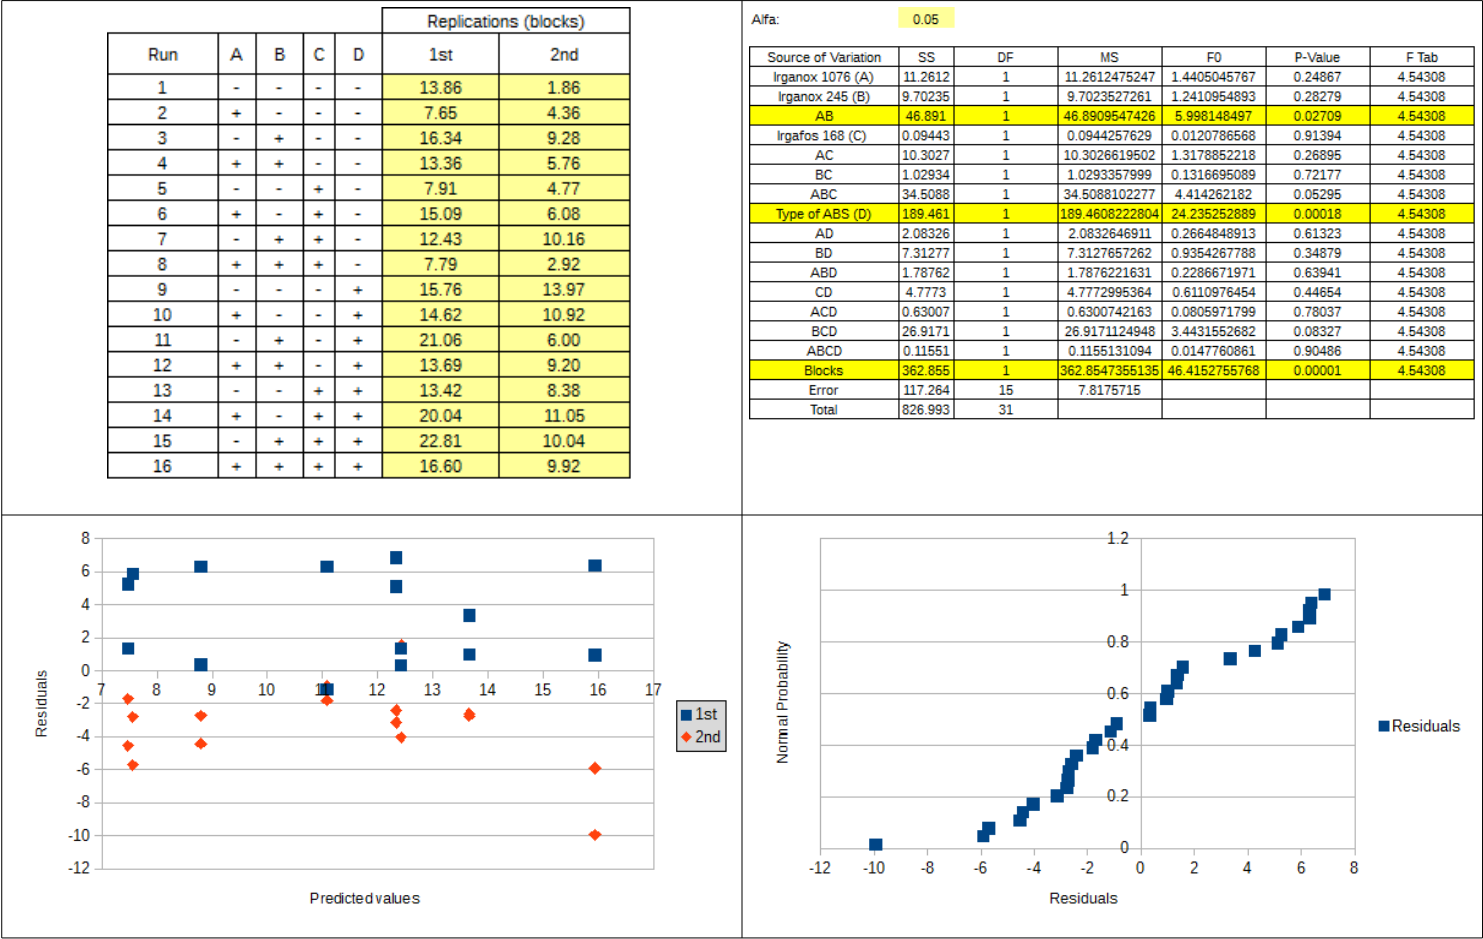

This scatter plot shows the residuals for 16 runs. The x-axis represents predicted values from 7 to 17, and the y-axis represents residuals from -12 to 8. Data points are categorized by replication: 1st (blue squares) and 2nd (red diamonds). The 1st replication points are generally higher than the 2nd replication points, indicating a systematic difference between the two groups.

This plot shows the residuals against a normal probability scale. The x-axis is labeled 'Residuals' and ranges from -12 to 8. The y-axis is labeled 'Normal Probability' and ranges from 0 to 1.2. The data points, represented by blue squares, follow a linear trend, suggesting that the residuals are normally distributed.
